# Supplementary figures and images for: Guided Self-Help Treatment for Recurrent Binge Eating: Replication and Extension
Source: Atypon-hosted journal article supplement (doi:10.1176/ps.62.4.pss6204_0367), 2011-04-01

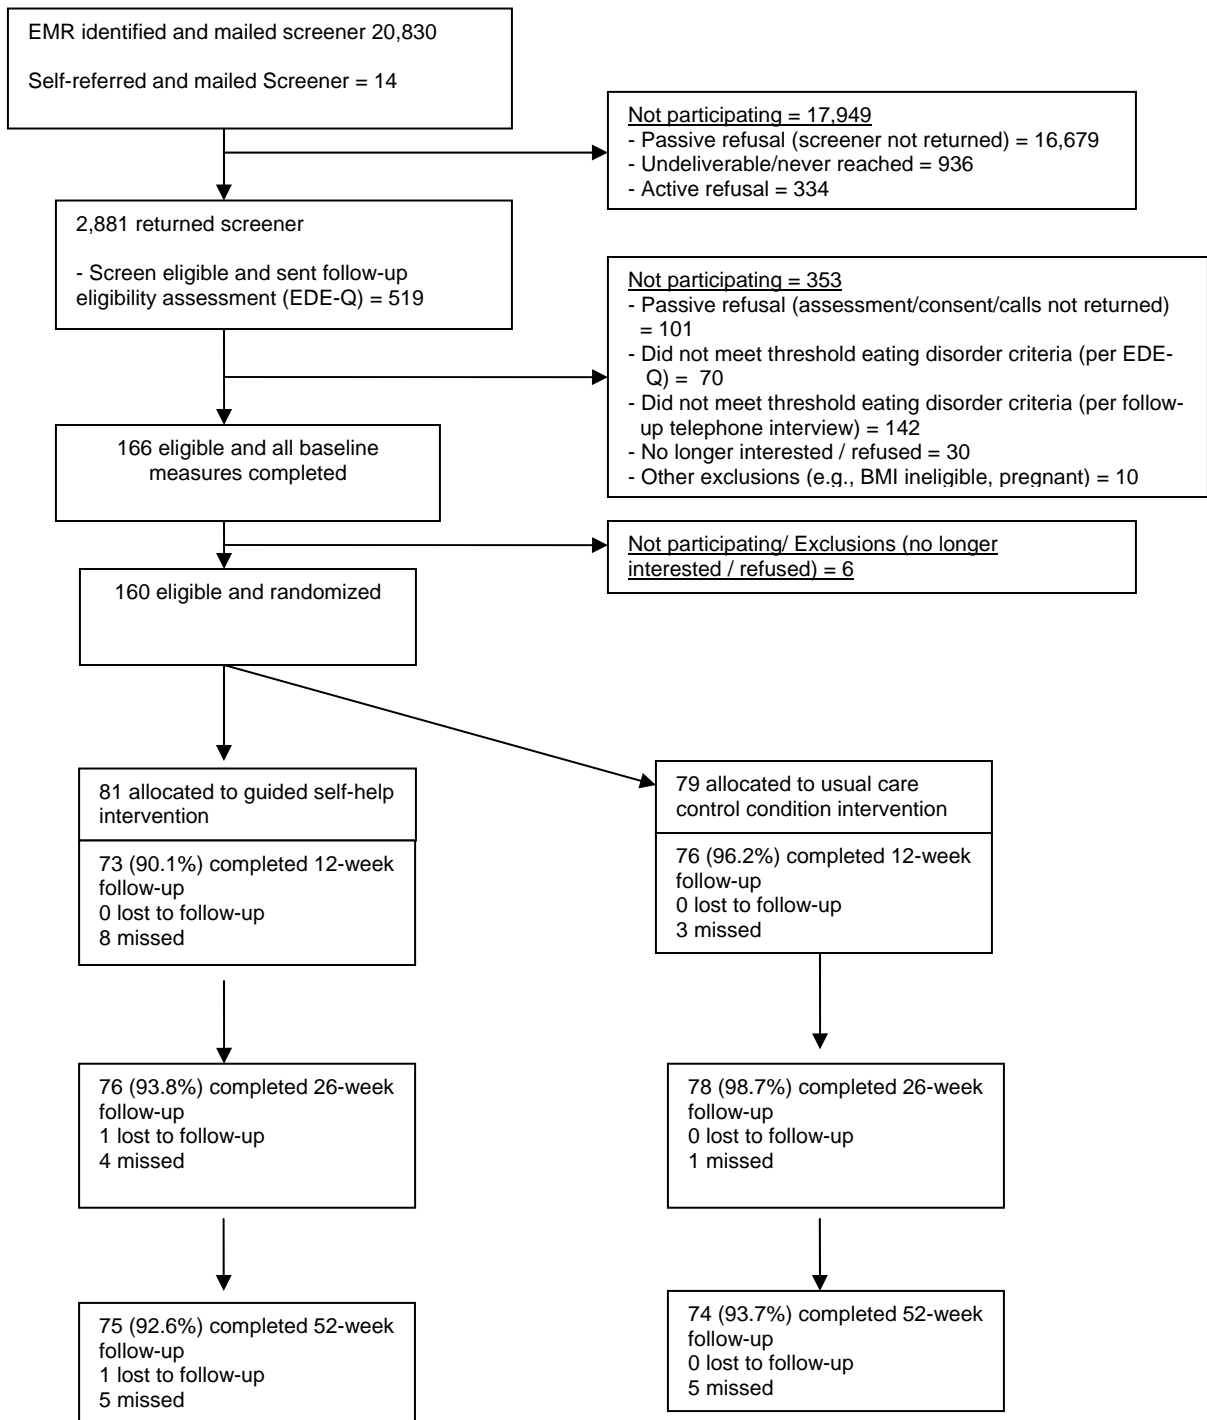

Supplement: debar_ds.pdf [file debar_ds.pdf]
